# Supplementary material for: Expression patterns of plexins and neuropilins are consistent with cooperative and separate functions during neural development
Source: PubMed Central journal article supplement (PMC1543641; doi:10.1186/1471-213x-6-32), 2006-07-17

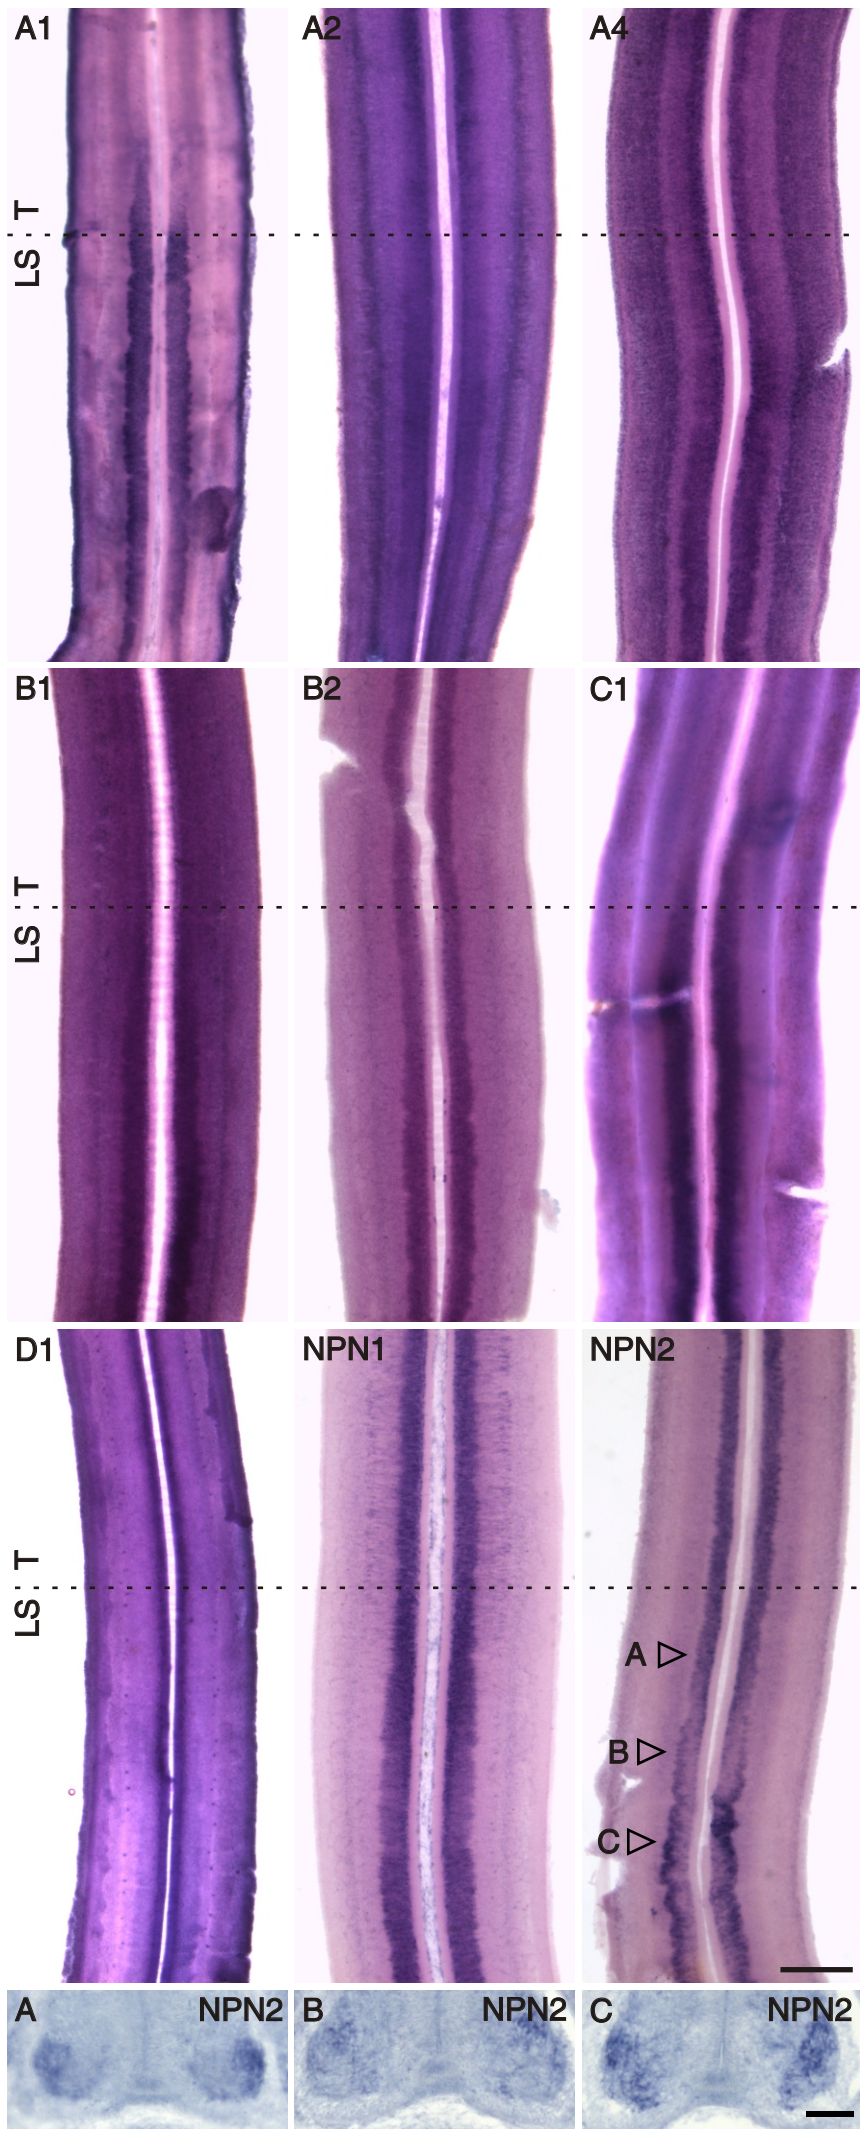

Supplement: 1471-213X-6-32-S3.pdf [file 1471-213X-6-32-S3.pdf]
